# Supplementary material for: Prenatal Clinical Findings in RASA1-Related Capillary Malformation-Arteriovenous Malformation Syndrome
Source: MDPI journal article supplement (doi:10.3390/genes14030549), 2023-02-22
Supplement: s1 [file s1]

**Table S1.** List of primer sequences.

| <b>Name</b>       | <b>Sequence 5'----3'</b> |
|-------------------|--------------------------|
| RASA1 23F         | TAATTACTTTTGCACCAACC     |
| RASA1 23R         | TTTGTTTAGGAAGGCAGAC      |
| RASA1 cDNA 21-25F | CTTCGACTCATCTGTCCTG      |
| RASA1 cDNA 21-25R | GAAGCAGTTCTGTTATAGCC     |
| RASA1 RT 2-3F     | ACGATAGCAGAAGAACGCC      |
| RASA1 RT 2-3R     | CCACCAATGTAGTAATCTCCAC   |
| HRAS RT 1-2F      | GGAGCGATGACGGAATATAAG    |
| HRAS RT 1-2R      | TGATGGCAAACACACACAG      |
| EPHB2 RT 7-8F     | AAAAAGCCCCACCAACAC       |
| EPHB2 RT 7-8R     | TGACAACCACAGCAATGAG      |
| ARHGAP35 RT 3-4F  | AAACCAAAGCCCAAACCC       |
| ARHGAP35 RT 3-4R  | GCAGACTCTCCATCTCAGAC     |
| ACTB F            | GCAAGAGATGGCCACGGCTG     |
| ACTB R            | ATCCACACGGAGTACTTGCG     |
